# Supplementary material
Source: publisher figshare collection journal article supplement (https://rs.figshare.com/ndownloader/files/14198858)
Supplement: Supplementary file 1 [file 14198858]

**SUPPLEMENTARY MATERIALS**

| **Table S1.** Results of a 2 x 2 ANOVA examining differences in the GSM questionnaire | | | | |
| --- | --- | --- | --- | --- |
|  | df | F | P | η2 |
| Session | 1, 69 | .09 | .76 | .001 |
| Brain Site | 1, 69 | .09 | .75 | < .001 |
| Session x Brain Site | 1, 69 | 1.19 | .27 | < .01 |
|  | | | | |

| **Table S2.** Results of a 2 x 2 ANOVA examining differences in the NARS questionnaire | | | | |
| --- | --- | --- | --- | --- |
|  | df | F | P | η2 |
| Session | 1, 69 | 1.45 | .23 | < .01 |
| Brain Site | 1, 69 | .20 | .65 | < .01 |
| Session x Brain Site | 1, 69 | .04 | .84 | < .001 |
|  | | | | |

**Brain Modeling**

PF stimulation reached multiple prefrontal structures, including the left medial prefrontal cortex (lMPFC), dorsolateral prefrontal cortex (lDLPFC), dorsomedial prefrontal cortex (lDMPFC), ventromedial prefrontal cortex (lVMPFC), and anterior cingulate cortex (lACC): Soterix showed peak stimulation intensities per 1 mA of 0.34 V/m at lMPFC (MNI coordinates: x = -44, y = 44, z = -6; Müller, Leske, Hartmann, Szebényi, & Weisz, 2014), 0.3 V/m at lDLPFC (MNI coordinates: x = -37, y = 36, z = 18; Rudorf, & Hare, 2014), 0.3 V/m at lDMPFC (MNI coordinates: x = -6, y = 29, z = 40; Hermann et al., 2013), 0.12 V/m at lVMPFC (MNI coordinates: x = -12, y = 56, z = 4; De Martino, Fleming, Garrett, & Dolan, 2013), and 0.18 V/m at left ACC (MNI coordinates: x = -6, y = 26, z = 26; Jahn, Nee, Alexander, & Brown, 2015). The maximum field intensity was at .57 V/m and was found approximately at (MNI, x = -23, y = 14, z = 0) for PF stimulation.

For TP stimulation, structures that received stimulation included the left temporo-parietal junction (lTPJ), left superior temporal sulcus (lSTS), left precuneus (lPRC), and left fusiform face area (IFFA): Soterix showed peak stimulation intensities per 1 mA of 0.33 V/m at lTPJ (MNI coordinates: x = -50, y = -56, z = 24; Wiese et al., 2018), 0.24 V/m at lSTS (MNI coordinates: x = -55, y = -52, z = 12; Yang, Zhen, Huang, Kong, Wang et al., 2016), 0.25 V/m at lPRC (MNI coordinates: x = -10, y = -66, z = 24; De Pisapia et al., 2016), and 0.23 V/m at lFFA (MNI coordinates: x = -44, y = -50, z = -20; Summerfield, Monti, Trittschuh, Mesulam, & Egner, 2008). The maximum field intensity was at .77 V/m and was found approximately at (MNI, x = -2. y = -52, z = -26) for TP stimulation. See **Figure 1** for visual FEM models.

**Behavioral Results**

To examine error rates across the different conditions, we also ran a 2 (Agent Type: Human vs. Robot) x 2 (Session: Baseline vs. Stimulation) x 2 (Brain site: Prefrontal vs. Temporoparietal) on Accuracy rates of participant’s gaze cueing data. The ANOVA revealed no significant main effect of Agent Type (F(1,70) = 1.11, p = .3, η2 = .001), Stimulation (F(1,70) = .31, p = .58, η2 < .001), or Brain site (F(1,70) = .51, p = .48, η2 < .01). The interaction effects between Agent Type and Stimulation site (F(1,70) = .85, p = .36, η2 < .001), Brain site and Session (F(1,70) = .27, p = .6, η2 < .001), Session and Agent Type (F(1,70) = 1.11, p = .3, η2 = .001), and the three-way interaction between the three factors were all nonsignificant (F(1,70) = .82, p = .37, η2 < .001).
